# Supplementary material for: Analysis of the association between codon optimality and mRNA stability in Schizosaccharomyces pombe
Source: PubMed Central journal article supplement (PMC5101800; doi:10.1186/s12864-016-3237-6), 2016-11-08
Supplement: 12864_2016_3237_MOESM19_ESM.pdf [file 12864_2016_3237_MOESM19_ESM.pdf]

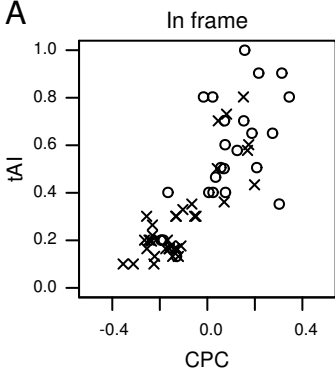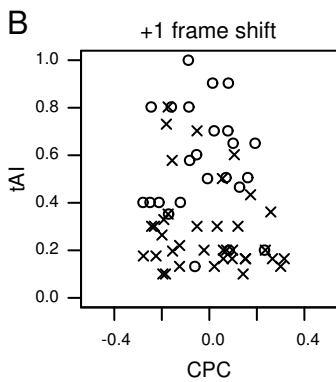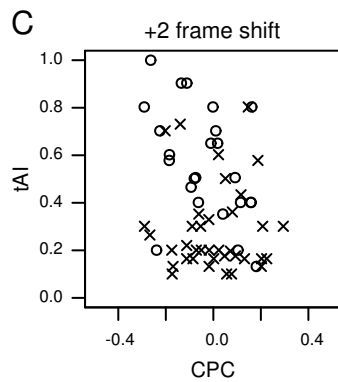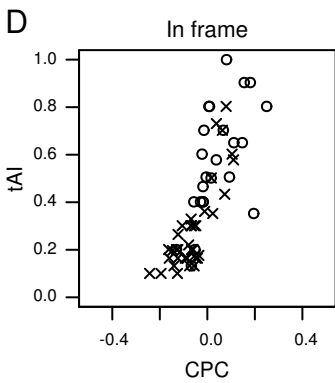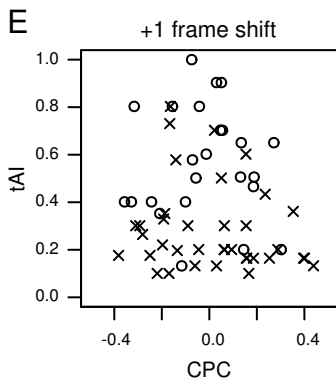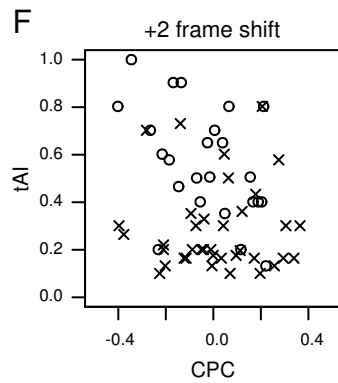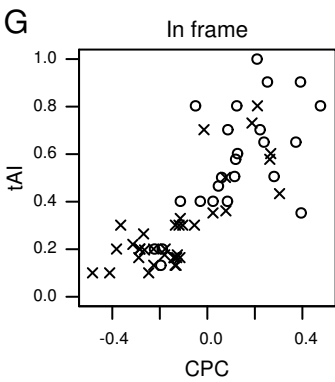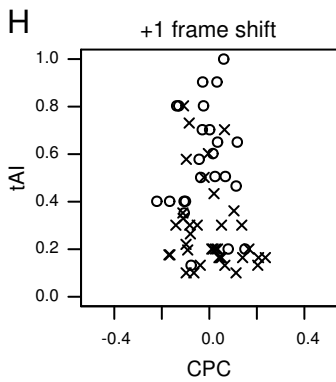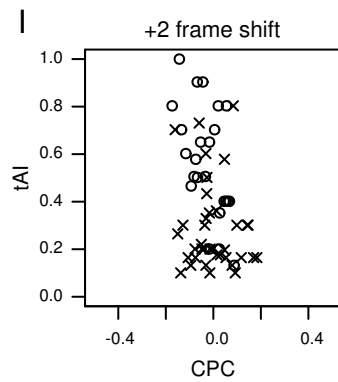

○ Optimal codons  
× Non-optimal codons
